# Supplementary material
Source: Research Square preprint supplement (doi:10.21203/rs.3.rs-10155568/v1)
Supplement: Supplementary file 1 [file 1aa25238872663bccfe98be5.xlsx]

## Sheet: Sheet1
	Basal-HS	Basal-LS	HER2	LumA-HS	LumA-LS	LumB-HS	LumB-LS	Normal-like
GEC1	2	5	6	0	24	1	6	17
GEC2	0	1	30	2	6	6	18	1
GEC3	1	0	6	11	62	49	18	1
GEC4	0	0	14	4	38	26	15	5
GEC5	62	12	1	0	0	0	0	2
GEC6	57	15	0	0	0	0	0	2
