# Supplementary material
Source: Research Square preprint supplement (doi:10.21203/rs.3.rs-10155568/v1)
Supplement: Supplementary file 2 [file 1f2a9c296a4d5382b87f2495.xlsx]

## Sheet: Sheet2
Method	Number of genes in final model	Accuracy (testing set)	Time (s)
RFES	60	95.45	7985.84
RFE	150	94.31	123.56
GA	236	90.52	13047.8
SA	77	86	370.08
