# Supplementary material
Source: Research Square preprint supplement (doi:10.21203/rs.3.rs-10155568/v1)
Supplement: Supplementary file 3 [file 60b52bc8a63d1037d08e763e.xlsx]

## Sheet: Sheet1
Cells	Paths	Pearson correlation	GEC
Macrophages M0	chondroitin and dermatan sulfate polymerization pathway	0.41153	GEC2
Macrophages M0	collagen glycosylation pathway	0.449487	GEC2
Macrophages M0	glycosaminoglycan core structure biosynthetic pathway	0.421954	GEC2
Macrophages M0	glycosaminoglycan polymerization pathway	0.443366	GEC2
Macrophages M0	heparan sulfate polymerization pathway	0.41981	GEC2
Macrophages M1	chondroitin and dermatan sulfate core structure biosynthetic pathway	-0.467868	GEC2
Macrophages M1	core 1 type o-N-acetylgalactosamine type glycan biosynthetic pathway	0.422355	GEC2
Macrophages M1	glycan biosynthetic pathway	-0.430209	GEC2
Macrophages M1	glycosaminoglycan core structure biosynthetic pathway	-0.60181	GEC2
Macrophages M1	heparan sulfate core structure biosynthetic pathway	-0.542334	GEC2
Macrophages M1	o-linked glucose biosynthetic process	-0.416754	GEC2
Macrophages M1	o-linked xylose glycosaminoglycan core structure biosynthetic pathway	-0.591257	GEC2
Macrophages M2	chondroitin and dermatan sulfate core structure biosynthetic pathway	0.469996	GEC2
Macrophages M2	chondroitin and dermatan sulfate polymerization pathway	0.517978	GEC2
Macrophages M2	chondroitin and dermatan sulfate sulfation pathway	0.4711	GEC2
Macrophages M2	collagen glycosylation pathway	0.476865	GEC2
Macrophages M2	glycan biosynthetic pathway	0.401081	GEC2
Macrophages M2	glycan degradation pathway	0.473658	GEC2
Macrophages M2	glycan elongation and branching biosynthetic pathway	0.531163	GEC2
Macrophages M2	glycosaminoglycan core structure biosynthetic pathway	0.433862	GEC2
Macrophages M2	glycosaminoglycan degradation pathway	0.411651	GEC2
Macrophages M2	glycosaminoglycan polymerization pathway	0.497191	GEC2
Macrophages M2	glycosylation-related pathway	0.421837	GEC2
Macrophages M2	heparan sulfate core structure biosynthetic pathway	0.411243	GEC2
Macrophages M0	POFUT2-Type o-linked fucose biosynthetic pathway	0.448162	GEC1
Macrophages M0	chondroitin and dermatan sulfate core structure biosynthetic pathway	0.487817	GEC1
Macrophages M0	chondroitin and dermatan sulfate sulfation pathway	0.536677	GEC1
Macrophages M0	chondroitin sulfate degradation pathway	0.535562	GEC1
Macrophages M0	dermatan sulfate degradation pathway	0.56359	GEC1
Macrophages M0	glucose transport	0.548694	GEC1
Macrophages M0	glycan degradation pathway	0.492588	GEC1
Macrophages M0	glycan monosaccharide modification pathway	0.519805	GEC1
Macrophages M0	glycan monosaccharide sulfation pathway	0.490989	GEC1
Macrophages M0	glycan-mediated lysosomal targeting	0.445701	GEC1
Macrophages M0	glycosaminoglycan degradation pathway	0.544481	GEC1
Macrophages M0	glycosaminoglycan lysosomal degradation pathway	0.498304	GEC1
Macrophages M0	glycosaminoglycan sulfation pathway	0.509776	GEC1
Macrophages M0	glycosylation-related pathway	0.446565	GEC1
Macrophages M0	guanosine-5-diphosphate mannose synthetic pathway	0.529915	GEC1
Macrophages M0	heparan sulfate core structure biosynthetic pathway	0.428734	GEC1
Macrophages M0	hyaluronic acid degradation pathway	0.451426	GEC1
Macrophages M0	keratan sulfate degradation pathway	0.424908	GEC1
Macrophages M0	keratan sulfate lysosomal degradation pathway	0.448336	GEC1
Macrophages M0	keratan sulfate sulfation pathway	0.410357	GEC1
Macrophages M0	lysosomal glycan degradation pathway	0.441317	GEC1
Macrophages M0	monosaccharide transport	0.548694	GEC1
Macrophages M0	o-linked xylose glycosaminoglycan core structure biosynthetic pathway	0.416482	GEC1
Macrophages M0	protein sulfation process	0.546979	GEC1
Macrophages M0	type ii lactosamine biosynthetic pathway	0.545775	GEC1
Macrophages M0	type ii lactosamine extension of o-n-acetylgalactosamine glycan biosynthetic pathway	0.50869	GEC1
Macrophages M1	I branching biosynthetic pathway	0.441323	GEC1
Macrophages M1	POFUT2-Type o-linked fucose biosynthetic pathway	-0.421706	GEC1
Macrophages M1	chondroitin and dermatan sulfate core structure biosynthetic pathway	-0.47558	GEC1
Macrophages M1	chondroitin and dermatan sulfate sulfation pathway	-0.41672	GEC1
Macrophages M1	glycosaminoglycan degradation pathway	-0.434958	GEC1
Macrophages M1	heparan sulfate core structure biosynthetic pathway	-0.427804	GEC1
Macrophages M1	heparan sulfate degradation pathway	-0.525915	GEC1
Macrophages M1	heparan sulfate lysosome degradation pathway	-0.525915	GEC1
Macrophages M1	hyaluronic acid degradation pathway	-0.476005	GEC1
Macrophages M1	o-fucosylation type glycan biosynthetic pathway	-0.438953	GEC1
Macrophages M2	chondroitin and dermatan sulfate core structure biosynthetic pathway	0.435892	GEC1
Macrophages M2	chondroitin and dermatan sulfate polymerization pathway	0.436502	GEC1
Macrophages M2	collagen glycosylation pathway	0.474971	GEC1
Macrophages M2	extracellular glycan degradation pathway	0.441148	GEC1
Macrophages M2	glycosaminoglycan core structure biosynthetic pathway	0.456644	GEC1
Macrophages M2	glycosaminoglycan degradation pathway	0.41148	GEC1
Macrophages M2	heparan sulfate core structure biosynthetic pathway	0.412806	GEC1
Macrophages M2	protein sulfation process	0.479488	GEC1
Macrophages M2	putative or unknown glycosylation pathway	0.484882	GEC1
Macrophages M0	core 1 type o-N-acetylgalactosamine type glycan biosynthetic pathway	-0.500021	GEC3
Macrophages M0	hyaluronan biosynthetic pathway	-0.408742	GEC3
Macrophages M0	protein sulfation process	-0.58038	GEC3
Macrophages M0	type iii lactosamine biosynthetic pathway	-0.538403	GEC3
Macrophages M1	POMGNT1-type o-mannose glycan biosynthetic pathway	-0.470035	GEC3
Macrophages M1	chondroitin and dermatan sulfate core structure biosynthetic pathway	-0.487453	GEC3
Macrophages M1	core 1 type o-N-acetylgalactosamine type glycan biosynthetic pathway	0.484637	GEC3
Macrophages M1	core 2 type o-N-acetylgalactosamine type glycan biosynthetic pathway	0.435699	GEC3
Macrophages M1	heparan sulfate core structure biosynthetic pathway	-0.499991	GEC3
Macrophages M1	heparan sulfate degradation pathway	-0.461508	GEC3
Macrophages M1	heparan sulfate lysosome degradation pathway	-0.461508	GEC3
Macrophages M1	o-linked glucose biosynthetic process	0.459684	GEC3
Macrophages M1	o-linked xylose glycosaminoglycan core structure biosynthetic pathway	-0.486474	GEC3
Macrophages M1	protein sulfation process	0.48738	GEC3
Macrophages M1	type iii lactosamine biosynthetic pathway	0.530559	GEC3
Macrophages M2	glucose transport	-0.625136	GEC3
Macrophages M2	monosaccharide transport	-0.625136	GEC3
Macrophages M2	type ii lactosamine biosynthetic pathway	-0.541526	GEC3
Macrophages M2	type ii lactosamine extension of o-n-acetylgalactosamine glycan biosynthetic pathway	-0.447501	GEC3
Mast cells resting	glycosaminoglycan core structure biosynthetic pathway	0.496343	GEC3
Mast cells resting	n-acetylneuraminic acid acetylation and deacetylation pathway	0.413487	GEC3
Mast cells resting	xenobiotic glucuronidation pathway	0.497115	GEC3
Macrophages M0	glucose transport	0.425724	GEC6
Macrophages M0	glycan elongation and branching biosynthetic pathway	0.55058	GEC6
Macrophages M0	glycan monosaccharide modification pathway	0.422927	GEC6
Macrophages M0	glycan monosaccharide sulfation pathway	0.438385	GEC6
Macrophages M0	glycosaminoglycan sulfation pathway	0.445659	GEC6
Macrophages M0	monosaccharide transport	0.425724	GEC6
Macrophages M0	type ii lactosamine biosynthetic pathway	0.557874	GEC6
Macrophages M0	type ii lactosamine extension of o-n-acetylgalactosamine glycan biosynthetic pathway	0.502775	GEC6
Macrophages M1	heparan sulfate sulfation pathway	-0.521472	GEC6
Macrophages M2	glycan elongation and branching biosynthetic pathway	-0.418619	GEC6
Macrophages M2	glycan-mediated lysosomal targeting	0.451557	GEC6
Macrophages M2	putative or unknown glycosylation pathway	0.483752	GEC6
Macrophages M2	type ii lactosamine biosynthetic pathway	-0.4633	GEC6
Macrophages M2	type ii lactosamine extension of o-n-acetylgalactosamine glycan biosynthetic pathway	-0.423315	GEC6
Mast cells resting	glycan biosynthesis regulation	0.415982	GEC6
Mast cells resting	o-n-acetylglucosamine protein glycosylation pathway	-0.504986	GEC6
Macrophages M0	collagen glycosylation pathway	0.418716	GEC5
Macrophages M1	chondroitin and dermatan sulfate core structure biosynthetic pathway	-0.477113	GEC5
Macrophages M1	glycosaminoglycan core structure biosynthetic pathway	-0.40227	GEC5
Macrophages M1	heparan sulfate core structure biosynthetic pathway	-0.462237	GEC5
Macrophages M2	POFUT2-Type o-linked fucose biosynthetic pathway	0.443185	GEC5
Macrophages M2	POMGNT1-type o-mannose glycan biosynthetic pathway	0.423116	GEC5
Macrophages M2	chondroitin and dermatan sulfate core structure biosynthetic pathway	0.512019	GEC5
Macrophages M2	chondroitin and dermatan sulfate polymerization pathway	0.468832	GEC5
Macrophages M2	chondroitin and dermatan sulfate sulfation pathway	0.47453	GEC5
Macrophages M2	chondroitin sulfate degradation pathway	0.656335	GEC5
Macrophages M2	dermatan sulfate degradation pathway	0.672328	GEC5
Macrophages M2	glycan biosynthetic pathway	0.548251	GEC5
Macrophages M2	glycan core structure biosynthetic pathway	0.453253	GEC5
Macrophages M2	glycan degradation pathway	0.579818	GEC5
Macrophages M2	glycan elongation and branching biosynthetic pathway	0.450012	GEC5
Macrophages M2	glycan monosaccharide modification pathway	0.557852	GEC5
Macrophages M2	glycan monosaccharide sulfation pathway	0.498538	GEC5
Macrophages M2	glycosaminoglycan core structure biosynthetic pathway	0.482713	GEC5
Macrophages M2	glycosaminoglycan degradation pathway	0.608011	GEC5
Macrophages M2	glycosaminoglycan lysosomal degradation pathway	0.688278	GEC5
Macrophages M2	glycosaminoglycan polymerization pathway	0.450383	GEC5
Macrophages M2	glycosaminoglycan sulfation pathway	0.48622	GEC5
Macrophages M2	glycosphingolipid degradation pathway	0.55811	GEC5
Macrophages M2	glycosphingolipid lysosomal degradation pathway	0.607237	GEC5
Macrophages M2	glycosylation-related pathway	0.603466	GEC5
Macrophages M2	heparan sulfate amine sulfation pathway	0.448001	GEC5
Macrophages M2	heparan sulfate core structure biosynthetic pathway	0.432399	GEC5
Macrophages M2	heparan sulfate degradation pathway	0.477505	GEC5
Macrophages M2	heparan sulfate lysosome degradation pathway	0.477505	GEC5
Macrophages M2	keratan sulfate degradation pathway	0.521838	GEC5
Macrophages M2	keratan sulfate lysosomal degradation pathway	0.53798	GEC5
Macrophages M2	lysosomal glycan degradation pathway	0.623469	GEC5
Macrophages M2	n-linked glycan degradation pathway	0.511686	GEC5
Macrophages M2	n-linked glycan lysosomal degradation pathway	0.481511	GEC5
Macrophages M2	o-fucosylation type glycan biosynthetic pathway	0.4398	GEC5
Macrophages M2	o-linked glycan degradation pathway	0.565711	GEC5
Macrophages M2	o-linked glycan lysosomal degradation pathway	0.579886	GEC5
Macrophages M2	o-n-acetylglucosamine protein glycosylation pathway	-0.400118	GEC5
Macrophages M2	protein sulfation process	0.588383	GEC5
Mast cells resting	glycosphingolipid degradation pathway	0.410798	GEC5
Mast cells resting	nucleotide sugar transport	0.458903	GEC5
Macrophages M0	collagen glycosylation pathway	0.415527	GEC4
Macrophages M1	heparan sulfate core structure biosynthetic pathway	-0.403515	GEC4
Macrophages M2	glycolipid core structure biosynthetic pathway	0.426206	GEC4
Macrophages M2	glycosylphosphatidylinositol anchor biosynthetic pathway	0.487894	GEC4
Mast cells resting	cytoplasmic glycan degradation pathway	-0.452451	GEC4
