# Supplementary material
Source: Research Square preprint supplement (doi:10.21203/rs.3.rs-10155568/v1)
Supplement: Supplementary file 4 [file 67b7e280e03d4545d6a83b6e.xlsx]

## Sheet: Sheet1
Glycogene	GEC1	GEC2	GEC3	GEC4	GEC5	GEC6
RPN1	91.2062	60.7089	64.2937	30.0739	52.1217	36.1723
GPI	78.5613	78.8232	66.2804	31.2403	55.2435	35.7365
STT3A	69.2775	73.3894	24.5798	35.4113	34.1547	39.4923
PLOD1	70.592	50.8342	80.8615	29.0293	56.1465	73.1264
GALNT6	60.5727	70.7079	38.7969	26.428	61.5939	67.5039
MGAT1	75.6916	57.6362	75.8339	0	45.2398	39.2519
UGCG	67.5322	63.1763	78.1742	40.4878	76.2086	78.3309
GALNT10	83.5074	64.9818	23.5378	30.103	84.1071	66.7428
UGDH	68.2713	82.0085	27.4306	14.3491	78.9772	64.3154
PAPSS1	75.46	82.1107	44.4902	69.0942	53.954	95.2456
GALNT7	66.0272	73.3291	65.4305	16.4859	85.5599	50.5796
NAGK	54.6557	67.2043	64.7882	16.7265	69.5712	67.2742
SLC2A10	74.268	68.3058	46.9763	44.0494	78.1903	65.8947
GNPTAB	70.5939	71.1226	20.662	82.4623	58.5189	55.9617
MAN2B1	77.4481	49.1284	77.2049	11.1323	64.3266	39.9807
FUT8	73.0208	53.0349	56.3405	24.4913	80.6972	77.0137
DPM2	81.7382	58.0084	25.5069	66.4281	47.4673	54.9494
GNPTG	68.2664	52.4948	14.184	69.686	45.3694	59.7318
HYAL2	48.0008	51.6658	67.3673	68.2747	47.7573	34.8048
LFNG	67.1657	71.2488	21.588	52.5851	51.5616	76.9385
TMTC3	55.7923	72.4633	58.7917	62.3288	84.0067	52.5954
PAPSS2	60.4027	74.2728	28.5748	29.4638	27.8809	36.7898
DNAJB11	77.2192	58.9966	58.5699	12.4285	64.142	40.1066
CSGALNACT2	72.1261	44.011	11.1876	66.2761	46.2848	43.9708
RFNG	70.3938	60.6436	62.0495	87.144	72.2882	51.2561
CHST11	72.8913	63.9454	76.1274	34.4742	45.0503	42.1801
DSE	91.5138	72.9625	30.6177	78.3375	48.1995	44.1197
B4GALT7	58.096	57.8136	27.5907	74.3302	53.7178	60.6852
GNPNAT1	63.7069	85.3406	29.4574	34.0494	43.394	40.1602
ALG6	73.8429	38.0339	21.8985	21.9937	32.0532	29.3598
CHST3	67.8074	65.1001	54.6542	60.077	63.375	80.6757
EOGT	78.0604	72.8582	13.6363	72.9095	55.6343	59.6536
ST3GAL2	84.779	48.4156	58.1702	10.3704	52.258	37.3021
ST6GALNAC4	66.79	48.7054	41.9781	14.63	62.8212	83.1633
SLC2A8	53.8614	49.3283	38.1084	85.3519	52.5196	56.5009
ARSB	74.623	73.5235	47.1971	64.2494	57.402	42.264
GFPT2	65.4261	55.9734	57.7379	37.9768	47.0599	44.9023
ARSG	66.8739	72.1534	89.2663	34.5208	78.7594	59.9502
GXYLT2	83.6097	62.0097	20.9147	54.3067	53.7334	22.1561
ALG10B	68.5735	54.0911	77.7459	14.3445	70.5996	20.8349
CSGALNACT1	68.2657	65.0658	35.9971	55.9433	41.4431	36.4022
IDUA	68.5524	53.58	13.155	71.1437	47.5813	80.3369
AMDHD2	64.3525	50.744	20.1509	62.1982	45.4647	60.3231
ST6GAL2	70.776	62.1592	24.1228	32.8549	74.9011	52.4092
GALNT15	78.4532	56.7218	21.7313	31.5572	57.3325	35.9343
CHST2	62.327	61.3025	68.0499	27.496	80.8017	48.2748
GALT	61.5818	69.7833	41.39	22.7313	83.979	45.793
ST3GAL6	66.5448	63.3367	65.0211	56.8928	47.5903	83.3862
IDS	74.4364	55.7801	8.10339	27.0982	66.4834	32.0471
B3GNT5	76.8528	60.2702	64.6519	82.4289	55.9583	90.3908
FUT4	71.1443	46.1382	58.0501	30.2892	51.2158	32.6557
CHSY3	80.482	63.8106	24.7571	52.9646	59.6442	39.4921
SLC2A5	61.6346	58.2521	76.5232	20.3163	55.4412	22.3663
GBGT1	79.0207	67.2595	72.7643	6.51943	71.2506	23.75
CHST6	52.0669	54.15	36.3904	55.5937	34.8377	73.3952
UGT8	70.985	76.8	61.9231	47.3768	72.3391	100
DPY19L2	55.2997	69.8984	16.9274	19.861	39.8758	28.1821
B4GALNT2	54.6286	70.2236	15.6568	5.72228	38.8065	30.4807
UGT2B15	65.2413	81.6398	45.1895	45.4023	76.7711	60.3454
UGT2B10	51.2955	75.0565	19.975	16.934	55.3786	40.94
